# Supplementary material
Source: PubMed Central journal article supplement (PMC3702052)
Supplement: NIHMS482722-supplement-1_si_001.pdf [file NIHMS482722-supplement-1_si_001.pdf]

## Supporting Information

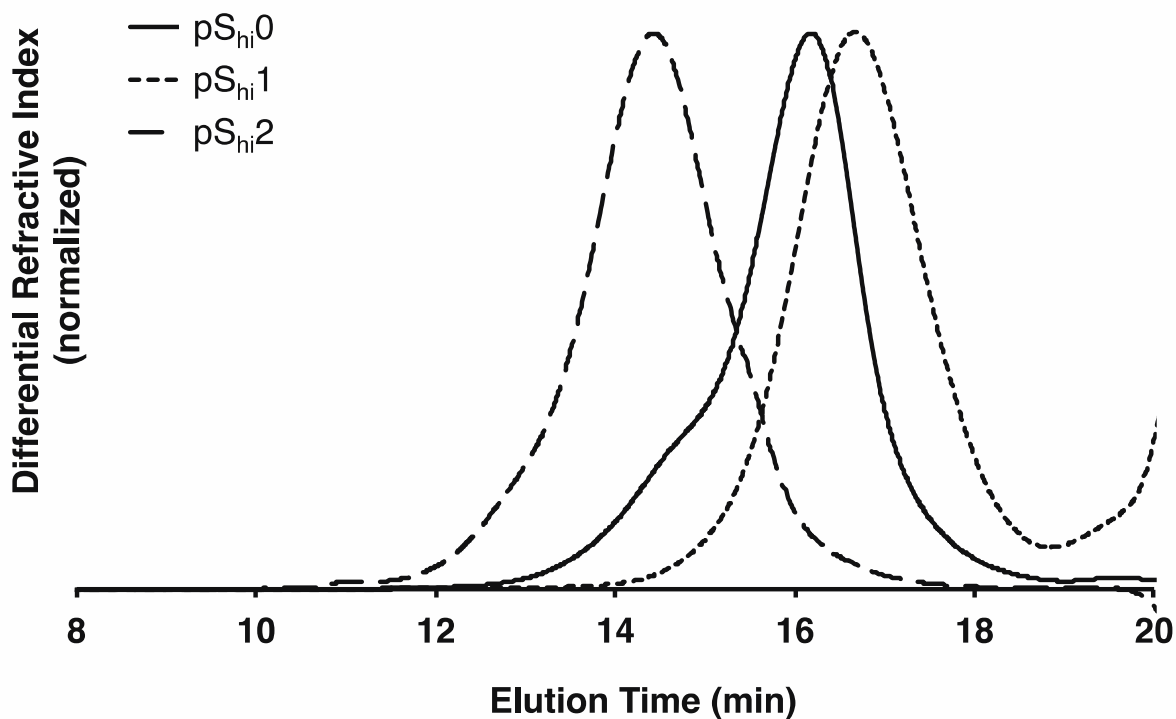

**Supplemental Figure 1.** Size exclusion chromatography of pS<sub>hi</sub> polymers. Molecular weight analysis of polymers was carried out by size exclusion chromatography with polymers at 10 mg/mL in running buffer (0.15 M sodium acetate buffer, pH 4.4). Absolute molecular weight averages ( $M_n$  and  $M_w$ ), and  $dn/dc$  were calculated using ASTRA software. The  $dn/dc$  for each copolymer was 0.133 mL/g.

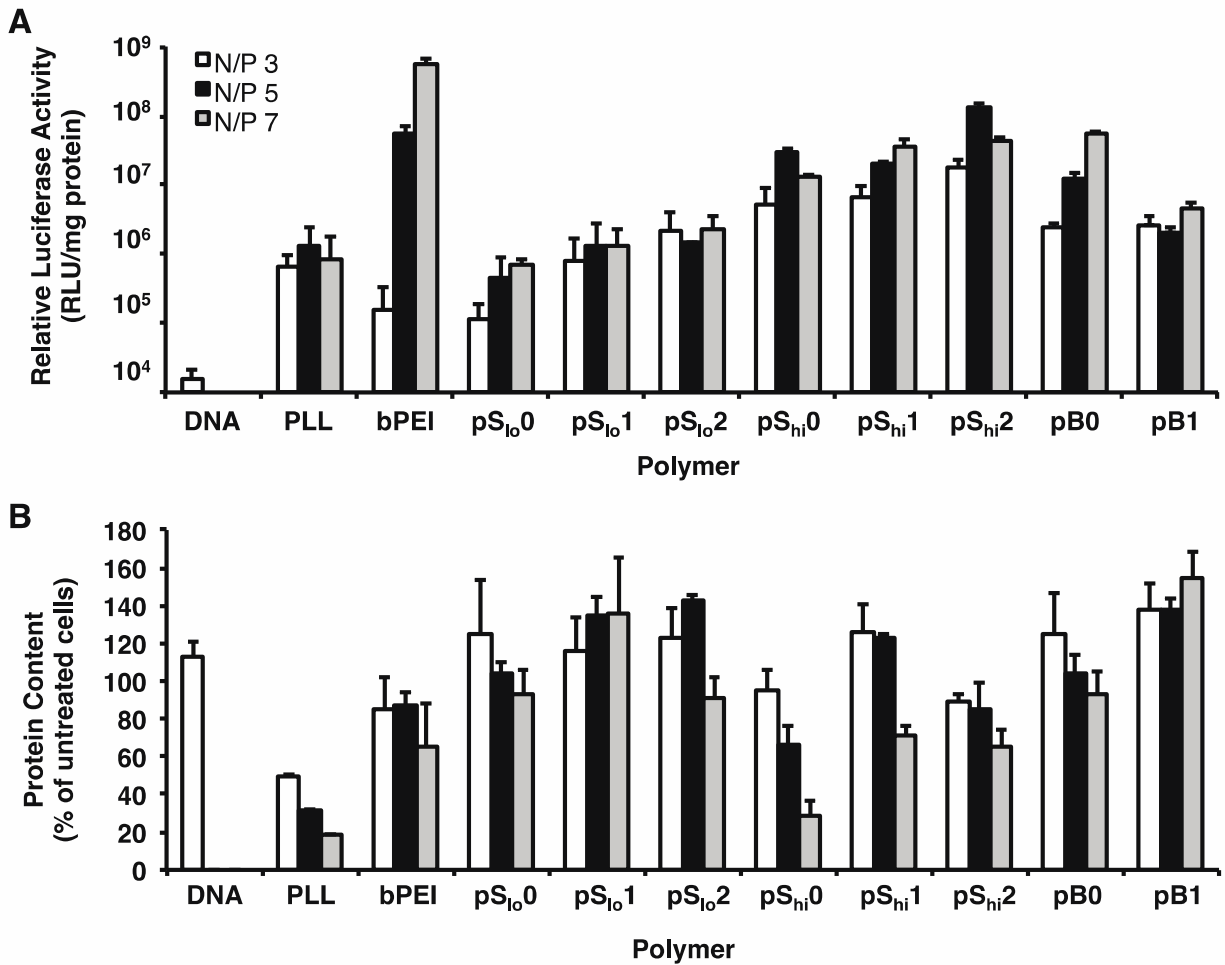

**Supplemental Figure 2.** Transfection of HPMA-oligolysine-oligohistidine polyplexes in HeLa cells. (A) Transfection efficiency and (B) protein content of HeLa cells transfected with polyplexes formulated with statistical (pS<sub>io</sub>0, pS<sub>io</sub>1, pS<sub>io</sub>2, and pS<sub>hi</sub>0, pS<sub>hi</sub>1, pS<sub>hi</sub>2) or diblock (pB0, pB1) and DNA (1  $\mu$ g) at N/P 3, 5, 7 under serum-free conditions. Data are presented as the mean  $\pm$  S.D.,  $n = 3$ , and representative of three independent experiments.
